# Supplementary material
Source: PubMed Central journal article supplement (PMC3569107)
Supplement: msy-0003-0255-s02.pdf [file msy-0003-0255-s02.pdf]

**Supplementary Table 1. List of primers used to amplify the coding regions of *RAB23***

| <b>Exons</b>  | <b>Forward primer</b>                | <b>Reverse primer</b>       |
|---------------|--------------------------------------|-----------------------------|
| 1             | TGCAATGTGATAATTTCTTGATAAAA           | CGAAATCCACTGCAATCAGTT       |
| 2             | GGTTTATTGGGACAACCCATC                | GAAGAATAATGAACTGGGGTTTT     |
| 3             | GGATAAAAGTTGCCCCCATC                 | TCATTAAAGCCTTCAAAATGAAA     |
| 4             | CCTTCCCTGCCAAACTGTAT                 | TGGAAAACCTTACGAGGATGA       |
| 5             | CATTGTACTCAGATACTGCCCAA              | TCACTTTTAAATCACATTTCTGAAAGA |
| 6             | AGATGCTAAATTTTGTGGATTTT              | TTCAGAGAGCCATTAGGAGCA       |
| <b>cDNA</b>   | TGAGCCAAATTGTGCTGTTC                 | GGGCAATAATTTTTCCACCA        |
| <b>TaqMan</b> | TTTGGAGCGACAAATTCAAG                 | TCCAACCTGGAAACTGCTTCA       |
| <b>Probe</b>  | 5`Fam_CCTCCTGACCTGCAGTGTCCCA_3`Tamra |                             |

**Supp. Table 2. Consensus value for potential 5` and 3` motifs of exon 5 for *RAB23* compiled using HSF software (<http://www.umd.be/HSF/>) [Desmet et al.2009].**

| Position | Splice site type | Motif          | New potential splice site | Consensus value* |
|----------|------------------|----------------|---------------------------|------------------|
| -12      | Acceptor         | ttttattctagTT  | ttttattctagTT             | 84.19 (WT)       |
| -4       | Acceptor         | ctagTTTTTAAGTA | ctagttttaagTA             | 75.65            |
| 5        | Donor            | TAAGTATTT      | TAAGtattt                 | 66.32            |
| 21       | Acceptor         | AAATACCTTCAGAA | aaatacctcagAA             | 82.38            |
| 40       | Acceptor         | AACAACAAATAGCT | aacaacaaatagCT            | 66.83            |
| 45       | Acceptor         | CAAATAGCTGAGGA | caaatagctgagGA            | 69.13            |
| 49       | Donor            | TAGCTGAGG      | TAGctgagg                 | 68.09            |
| 52       | Acceptor         | CTGAGGATCCAGAA | ctgaggatccagAA            | 79.97            |
| 68       | Acceptor         | AACGCATTCAAGTA | aacgcattcaagTA            | 71.25            |
| 71       | Acceptor         | GCATTCAAGTAGTA | gcattcaagtagTA            | 70.84            |
| 76       | Donor            | CAAGTAGTA      | CAAgtagta                 | 66.43            |
| 78       | Acceptor         | AGTAGTAACAAGAT | agtagtaacaagAT            | 67.32            |
| 79       | Donor            | GTAGTAACA      | GTAgtaaca                 | 68.56            |
| 91       | Donor            | TTGgtaagt      | TTGgtaagt                 | 93.27 (WT)       |
| 94       | Acceptor         | Gtaagtacatagga | gtaagtacatagGA            | 74.15            |
| +2       | Donor            | Taagtacat      | TAAgtacat                 | 66.47            |

\*The consensus value (CV) was set between 0-100. Lowercase nucleotides denote intronic sequences. Uppercase nucleotides represent exonic sequences. WT: wildtype indicates the consensus splice sites.
